# Supplementary material
Source: Elsevier journal article supplement (https://www.sciencedirect.com/science/article/pii/S2173578614000249)
Supplement: mmc1 [file S2173578614000249:mmc1.doc]

**ACKNOWLEDGEMENTS**

EURCIS study

José Mª Adot Zurbano

Arturo E. Alonso Rodrigo

Ignacio Arance Gil

José Manuel Aranda Lassa

Albert Arch Cañas

Fernando Arias Funez

Salvador Arlandis Guzmán

Francisco Arredondo Martínez

Pedro María Arrosagaray Etchepare

José Miguel Arroyo Maestre

Antonio Arruza Echevarria

Vicente Belvis Esclapes

Alberto Borrel Palanca

Josep Caballero Gine

Max Eusebio Cachay Ayala

José Antonio Cánovas Iborra

José Luís Carazo Carazo

Tomás Concepción Masip

Manuel de la Rosa Kehrmann

Juan Antonio de la Torre Pérez

Franklin Díaz Rodríguez

Enrique Díaz Calleja

Domingo Dorado Hidalgo

Ramón Durán Merino

Óscar Esteban Hernández

Atanasio Fernández Borrel

María Isabel Fuentes Márquez

David García Belmonte

Ángel García de Jalón Martínez

Julián García Ligero

Fructuoso García Díez

Josep M. Gili Massó

Carmen González Enguita

Juan Fco. Hermida Gutiérrez

Antonio R. Hernández Lao

Antonio Jiménez Pacheco

Manuel Leva Vallejo

Francisco Llovo Taboada

Luis López-Fando Lavalle

Doroteo Lozano Lázaro

Jesús Lozano Enguita

Saturnino Luján Marco

Blanca Madurga Patuel

Jorge Mariño Del Real

Virginia Martínez Barea

Francisco José Martínez Portillo

Esther Martínez Cuenca

José Medina Polo

Daniel Ricardo Mejía Rendón

Antonio Molina Carranza

Carlos Müller Arteaga

Marta Muniesa Caldero

Saturnino Napal Lecumberri

Joaquín Navarro Gil

Ángel Vicente Núñez López

Julián Oñate Celdrán

Yoni Pallas Costa

Carlos Pascual Mateo

Maria de la Paz Pérez Espejo

Helena Pérez-Seoane Ballester

Julius Piotr Struzik

Inmaculada Pozuelo Fernández

Pablo Quijano Barroso

José Luís Quintana De la Rosa

Manuel Rapariz González

Juan Manuel Roa Luciaraga

Javier Rodríguez Corchero

Federico Rodríguez-Rubio Cortadella

Luís Óscar Roletto Salmo

Ramon Romani Castro

Antonio Rosino Sánchez

Mariano Rosselló Barbarà

Jesús Manuel Ruiz García

Alfonso San Martín Blanco

Pedro Sánchez de la Muela

Manuel Sánchez Marcos

Francesc Serrallach Orejas

Francisco Serrano de la Cruz Torrijos

Ignacio Sola Galarza

Carlos Suárez Fonseca

Javier Tato Rodríguez

Carlos Vallejo Gil

Eduardo Vicente Palacio

Emilio Zarate Rodríguez

Carmen Zubiaur Libano
